# Supplementary material for: Substantial health and economic burden of COVID-19 during the year after acute illness among US adults not at high risk of severe COVID-19
Source: PubMed Central journal article supplement (PMC10835856; doi:10.1186/s12916-023-03235-5), 2024-02-02
Supplement: 12916_2023_3235_MOESM2_ESM.pdf [file 12916_2023_3235_MOESM2_ESM.pdf]

**Table S2. Hormone Prescriptions During the Baseline and Post-Acute Phase<sup>a</sup> in the Overall Population (N=3792)<sup>b</sup>**

| <b>USC Hormone Class Description</b> | <b>Baseline Phase, n (%)</b> | <b>Post-Acute Phase, n (%)</b> | <b>Change From Baseline to Post-Acute Phase, Δ (% Change)</b> |
|--------------------------------------|------------------------------|--------------------------------|---------------------------------------------------------------|
| Glucocorticoids plain oral           | 0 (0.0)                      | 366 (9.7)                      | 366 (NC)                                                      |
| Glucocorticoid plain injectable      | 62 (1.6)                     | 225 (5.9)                      | 163 (262.9)                                                   |
| Corticoids plain dermatological      | 145 (3.8)                    | 220 (5.8)                      | 75 (51.7)                                                     |
| Progestogen injectable               | 1 (0.0)                      | 4 (0.1)                        | 3 (300.0)                                                     |
| Other ACTH & mineralocorticoids      | 1 (0.0)                      | 3 (0.1)                        | 2 (200.0)                                                     |
| Progestogen oral                     | 34 (0.9)                     | 36 (0.9)                       | 2 (5.9)                                                       |
| Androgens injectable                 | 11 (0.3)                     | 13 (0.3)                       | 2 (18.2)                                                      |
| Progesterone antagonists             | 0 (0.0)                      | 1 (0.0)                        | 1 (NC)                                                        |
| Estrogens injectable                 | 0 (0.0)                      | 1 (0.0)                        | 1 (NC)                                                        |
| Glucocorticoids plain other          | 3 (0.1)                      | 3 (0.1)                        | 0 (0.0)                                                       |
| Progestogen vaginal                  | 2 (0.1)                      | 2 (0.1)                        | 0 (0.0)                                                       |
| Gonadotrophins                       | 5 (0.1)                      | 4 (0.1)                        | -1 (-20.0)                                                    |
| Androgens transdermal                | 3 (0.1)                      | 2 (0.1)                        | -1 (-33.3)                                                    |
| Corticoid combs dermatological       | 2 (0.1)                      | 1 (0.0)                        | -1 (-50.0)                                                    |

ACTH, adrenocorticotropic hormone; NC, not calculable; USC, Uniform System of Classification.

<sup>a</sup>The baseline period was the 12 months before the index date, and the post-acute phase spanned from 1 to 13 months after the index date.

<sup>b</sup>Includes all prescriptions, including those prescribed to <2% of the baseline population (which were excluded from the main analysis).
