# Supplementary material for: Substantial health and economic burden of COVID-19 during the year after acute illness among US adults not at high risk of severe COVID-19
Source: PubMed Central journal article supplement (PMC10835856; doi:10.1186/s12916-023-03235-5), 2024-02-02
Supplement: 12916_2023_3235_MOESM3_ESM.pdf [file 12916_2023_3235_MOESM3_ESM.pdf]

**Table S3. New Medication Prescriptions With a  $\geq 100\%$  Increase From the Baseline to the Post-Acute Phase<sup>a</sup> in the Overall Population (N=3792)<sup>b</sup>**

| <b>USC Medication Class Description</b> | <b>Baseline Phase, n (%)</b> | <b>Post-Acute Phase, n (%)</b> | <b>Change From Baseline to Post-Acute Phase, <math>\Delta</math> (% Change)</b> |
|-----------------------------------------|------------------------------|--------------------------------|---------------------------------------------------------------------------------|
| Parasympathetic drugs                   | 1 (0.0)                      | 10 (0.3)                       | 9 (900.0)                                                                       |
| Tuberculosis therapy                    | 1 (0.0)                      | 5 (0.1)                        | 4 (400.0)                                                                       |
| Anthelmintics                           | 3 (0.1)                      | 13 (0.3)                       | 10 (333.3)                                                                      |
| Miscellaneous preparations              | 12 (0.3)                     | 47 (1.2)                       | 35 (291.7)                                                                      |
| Hemostatic modifiers                    | 17 (0.4)                     | 64 (1.7)                       | 47 (276.5)                                                                      |
| Immunologic agents                      | 2 (0.1)                      | 7 (0.2)                        | 5 (250.0)                                                                       |
| Laxatives                               | 34 (0.9)                     | 112 (3.0)                      | 78 (229.4)                                                                      |
| Diagnostic aids                         | 66 (1.7)                     | 203 (5.4)                      | 137 (207.6)                                                                     |
| Anesthetics                             | 57 (1.5)                     | 165 (4.4)                      | 108 (189.5)                                                                     |
| Hormones                                | 228 (6.0)                    | 658 (17.4)                     | 430 (188.6)                                                                     |
| Diabetes therapy                        | 38 (1.0)                     | 107 (2.8)                      | 69 (181.6)                                                                      |
| Hospital solutions                      | 56 (1.5)                     | 154 (4.1)                      | 98 (175.0)                                                                      |
| Cardiac agents                          | 18 (0.5)                     | 47 (1.2)                       | 29 (161.1)                                                                      |
| Vascular agents                         | 130 (3.4)                    | 277 (7.3)                      | 147 (113.1)                                                                     |
| Blood factors                           | 17 (0.4)                     | 35 (0.9)                       | 18 (105.9)                                                                      |
| Nutrients & supplements                 | 13 (0.3)                     | 26 (0.7)                       | 13 (100.0)                                                                      |

USC, Uniform System of Classification.

<sup>a</sup>The baseline period was the 12 months before the index date, and the post-acute phase spanned from 1 to 13 months after the index date.

<sup>b</sup>Includes all prescriptions, including those prescribed to <2% of the baseline population (which were excluded from the main analysis).
